# Supplementary material for: Berberine Sulfate Attenuates Osteoclast Differentiation through RANKL Induced NF-κB and NFAT Pathways
Source: PubMed Central journal article supplement (PMC4661856; doi:10.3390/ijms161125998), 2015-11-13
Supplement: ijms-16-25998-s001.pdf [file ijms-16-25998-s001.pdf]

# Supplementary Materials: Berberine Sulfate Attenuates Osteoclast Differentiation through RANKL Induced NF- $\kappa$ B and NFAT Pathways

Lin Zhou, Fangming Song, Qian Liu, Mingli Yang, Jinmin Zhao, Renxiang Tan, Jun Xu, Ge Zhang, Julian M. W. Quinn, Jennifer Tickner and Jiake Xu

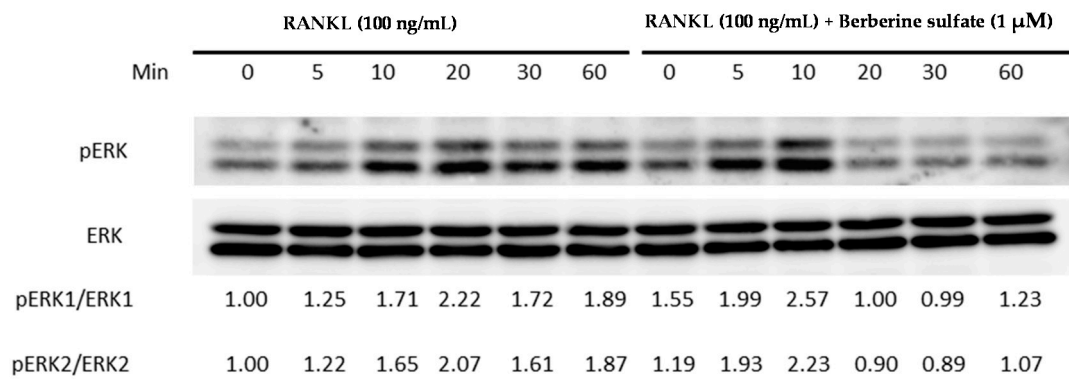

**Figure S1.** Berberine sulfate didn't inhibit the phosphorylation of ERK. BMM cells were pretreated with serum-free culture medium for 3 h, then berberine sulfate (1  $\mu$ M) for 1 h, and subsequently incubated with RANKL (100 ng/mL) for indicated times. The levels of pERK and ERK were evaluated by Western blot analysis.
